# Supplementary material for: Development of an open-source flow-through cyclic voltammetry cell for real-time inline reaction analytics
Source: Royal Society of Chemistry journal article supplement (doi:10.1039/d3re00535f), 2023-11-18
Supplement: d3re00535f1.pdf [file d3re00535f1.pdf]

Electronic Supplementary Information (ESI)

# Development of an Open-Source Flow-Through Cyclic Voltammetry Cell for Real-Time Inline Reaction Analytics

Eduardo Rial-Rodríguez,<sup>a,b</sup> Jason D. Williams,<sup>a,b</sup> Hans-Michael Eggenweiler,<sup>c</sup> Thomas Fuchss,<sup>c</sup> Alena Sommer,<sup>c</sup> C. Oliver Kappe,<sup>a,b</sup> and David Cantillo<sup>\*,a,b</sup>

<sup>a</sup> *Institute of Chemistry, University of Graz, NAWI Graz, Heinrichstrasse 28, 8010 Graz, Austria.  
E-mail: david.cantillo@uni-graz.at*

<sup>b</sup> *Center for Continuous Flow Synthesis and Processing (CCFLOW), Research Center  
Pharmaceutical Engineering GmbH (RCPE), Inffeldgasse 13, 8010 Graz, Austria*

<sup>c</sup> *Medicinal Chemistry and Drug Design, Merck Healthcare KGaA, Frankfurter Strasse 250,  
64293 Darmstadt, Germany*

## Table of Contents

|                                                                                        |   |
|----------------------------------------------------------------------------------------|---|
| <b>General experimental details</b> .....                                              | 2 |
| <b>Materials and assembly of the cell</b> .....                                        | 3 |
| <b>Experimental procedures:</b> .....                                                  | 5 |
| <b>Inline CV analysis of solutions of 1a of different concentration (Fig. 3)</b> ..... | 5 |
| <b>Inline CV monitoring of electrochemical oxidations of alcohols in flow.</b> .....   | 7 |

## General experimental details

**General Remarks.** HPLC was carried out on a Shimazu instrument equipped with a Macherey-Nagel Nucleodur C18 HTec column (150 mm × 4.6 mm, particle size 5 μm) at 37 °C using mobile phase A (H<sub>2</sub>O/acetonitrile (9+1 v/v) + 0.1% TFA) and B (acetonitrile + 0.1% TFA) at a flow rate of 0.6 mL min<sup>-1</sup>. The following gradient was applied: hold 5% of B for 2 minutes, then linear increase from 5% B to 20% B in 6 min, followed by a linear increase from 20% B to 100% B in 1 min, then hold 100% B for 1 min, followed by column equilibration time at 5% B for 5 min. The detection of compounds was accomplished using a diode array detector. All chemicals were obtained from standard commercial vendors and were used without any further purification. Materials for the assembly of the flow CV cell are listed in the next section.

## Materials and assembly of the cell

Cell components list (see also Fig. S1):

**1:** Platinum wire,  $\varnothing$  1.0 mm, 520 mg. SKU number: 327492-520MG

(inserted in a ca. 1.5 cm long PFA tubing of 1 mm i.d. and 1.6 mm o.d., which is fitted in the ferrule of a VacuTight™ Fitting 1/4-28)

**2:** VacuTight™ Fitting 1/4-28 - 1/8 PEEK, IDEX Part Number: P-948

(contains **1**)

**3:** Silver wire,  $\varnothing$  1.0 mm, 4.1 g. SKU number: 265594-4.1G

(inserted in a ca. 1.5 cm long PFA tubing of 1 mm i.d. and 1.6 mm o.d., which is fitted in the ferrule of a VacuTight™ Fitting 1/4-28)

**4:** PEEK Manifold Assembly 5 Port for 1/8" OD, IDEX Part Number: P-155

The 3 ports of the manifold used for installing electrodes were drilled 4.2 mm deeper using a 5 mm diameter drill bit to reduce the inner volume of the cell and permit that the electrodes are close to the center.

The ferrules for **1** and **3** were installed with ca. 1 mm of electrode rod protruding out of the ferrule.

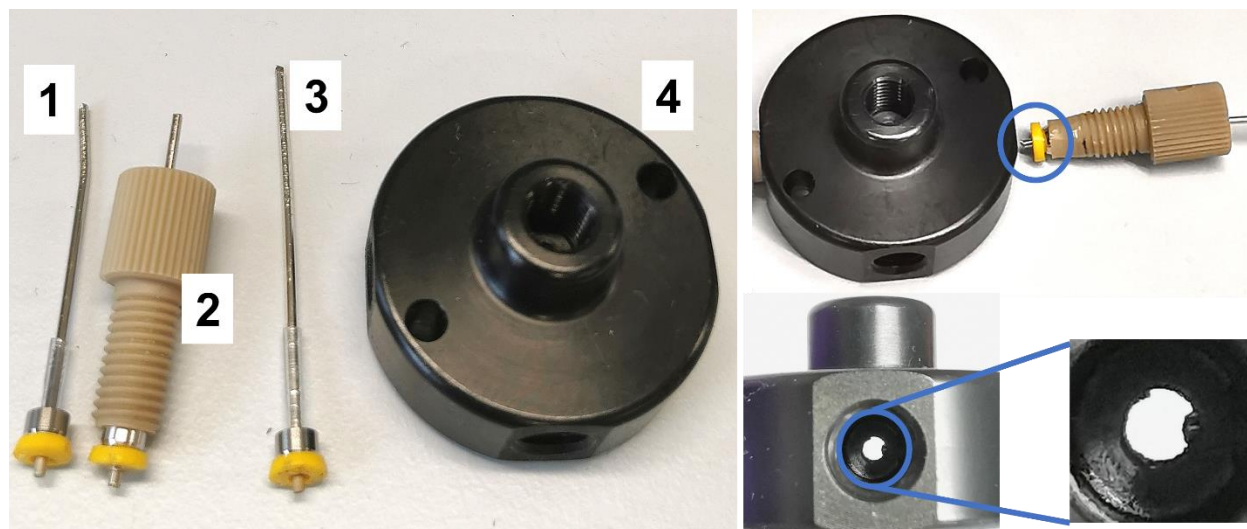

**Fig. S1.** Details on the components of the flow cell for inline cyclic voltammetry.

The potentiostat used is the 'Rodeostat: open source potentiostat' from IO Rodeo.

<https://iorodeo.com/products/rodeostat>

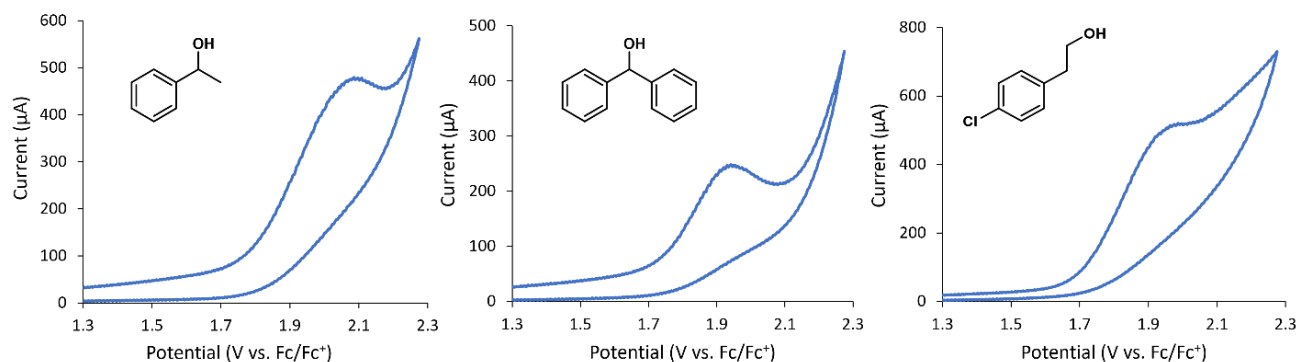

**Fig. S2.** Cyclic voltammograms of the three alcohols studied, recorded in-line with a flow rate of 70 μL/min; scan-rate: 0.5 V/s; 8 mM concentration of alcohol in MeCN with 0.1 M Et<sub>4</sub>NBF<sub>4</sub>. WE: Pt.

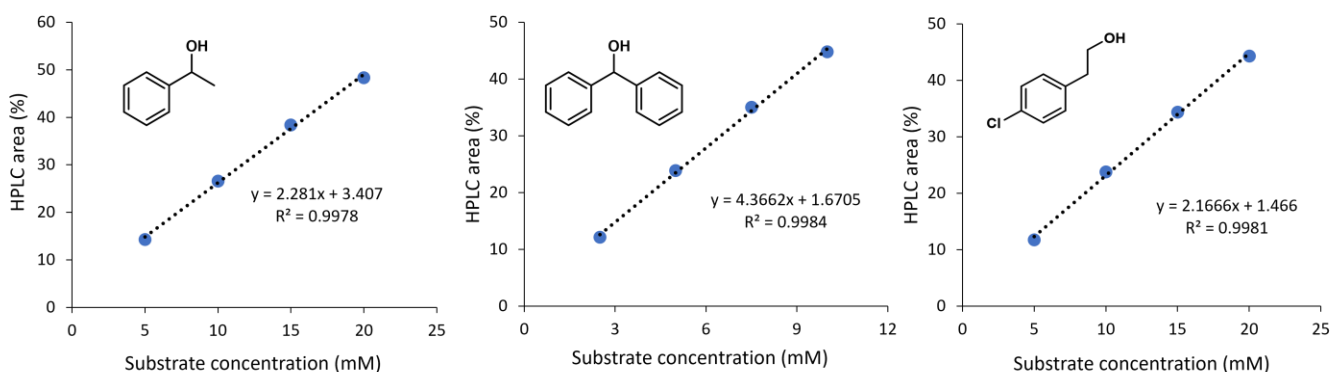

**Fig. S3.** Calibration of the HPLC quantification method at 215 nm for the model alcohol substrates.

## Experimental procedures:

### Inline CV analysis of solutions of **1a** of different concentration (Fig. 3)

- Preparation of 1-phenylethanol (**1a**) solutions:

50 mL of a stock solution containing 50 mM 1-phenylethanol (305 mg, 2.5 mmol), 50 mM trifluoroacetic acid (191  $\mu$ L, 2.5 mmol) and 100 mM Et<sub>4</sub>NBF<sub>4</sub> (1.09 g, 5.0 mmol) was prepared in MeCN (in a volumetric flask) and dried over 3 Å molecular sieves. In another volumetric flask, 50 mL of a blank stock solution was prepared with the same components except 1-phenylethanol. Variable amounts of the stock solution were diluted in volumetric flasks with the blank solution to obtain a series of new solutions with different 1-phenylethanol concentrations, but with a constant concentration of Et<sub>4</sub>NBF<sub>4</sub> and TFA.

- Inline cyclic voltammetry measurements:

Each of the solutions were sequentially pumped through the cell with a flow rate of 70  $\mu$ L/min using a syringe pump (Syrris Asia). The potentiostat was set to record the CV from 0 to +1.9 V vs Fc/Fc<sup>+</sup>, with a scan rate of 0.5 V/s. Each CV measurement was recorded under steady state conditions. The peak currents at +1.9 V vs Fc/Fc<sup>+</sup> for each solution are collected in Table S1 and represented in Fig. S4. After measurement, MeCN was passed through the cell for cleaning, and blank CV measurements were recorded to ensure that the working electrode was cleaned.

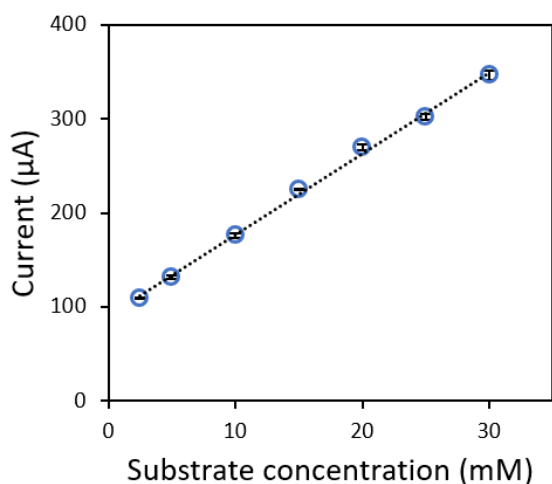

**Fig. S4.** Inline CV data for a series of solutions of **1a** of different concentration. Error bars represent standard deviation, as measures were taken in triplicate.

**Table S1.** Numerical values for the inline CV data of a series of solutions of **1a** of different concentration. Standard deviation corresponds to measured taken in triplicate.

| Entry | <b>1a</b> (mM) | CV max. measured current ( $\mu\text{A}$ ) | Standard deviation |
|-------|----------------|--------------------------------------------|--------------------|
| 1     | 2.5            | 108                                        | 1.01               |
| 2     | 5              | 132                                        | 1.67               |
| 3     | 10             | 179                                        | 2.55               |
| 4     | 15             | 226                                        | 0.71               |
| 5     | 20             | 272                                        | 3.37               |
| 6     | 25             | 301                                        | 3.22               |
| 7     | 30             | 350                                        | 5.02               |

## Inline CV monitoring of electrochemical oxidations of alcohols in flow.

The setup depicted in Fig. 4 in the manuscript and Fig. S4 below was used in all experiments. Feed solutions containing the corresponding alcohol (0.05 M), trifluoroacetic acid (0.05 M), water (50 mM) and Et<sub>4</sub>NBF<sub>4</sub> (0.1 M) in MeCN were prepared and pumped through the flow electrolysis cell at a flow rate of 124  $\mu$ L/min. Once steady state conditions were reached, a constant current was applied to the flow electrolysis cell using a BK Precision 1739 power supply. The reaction mixture from the outlet of the flow electrolysis cell, which during electrolysis consisted of a gas liquid mixture due to H<sub>2</sub> generation at the cathode, entered a Teflon AF2400 tube (1 mm i.d., 20 cm length). Release of the gas through the semipermeable tube could be visually observed and most of the gas segments had disappeared from the tubing before entering the flow CV cell. Inline CV of the liquid stream was carried out by scanning the cell potential from 0 to +1.9 V vs Fc/Fc<sup>+</sup>. All CV data were acquired under steady state conditions. To validate the inline CV data, aliquots of ca. 50  $\mu$ L were collected from the outlet of the flow setup, diluted with MeCN, and analyzed by HPLC. Each of the CV measurements were collected in triplicate.

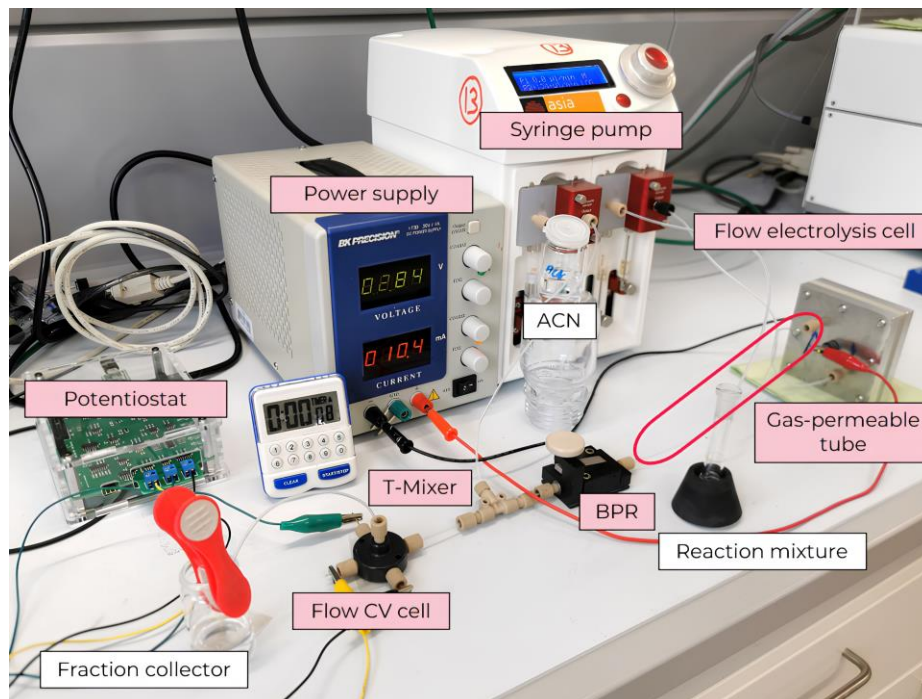

**Fig. S4.** Experimental setup utilized for the inline CV monitoring of electrochemical oxidations of alcohols in flow. The back-pressure regulator (BPR) can be optionally added at the end of the Teflon AF2400 tubing when high flow rates are used, to ensure that all H<sub>2</sub> gas is released. No back-pressure was applied in the experiments described in this work.

**Table S2.** Reaction parameters and inline cyclic voltammetry for the oxidation of 1-phenylethanol (**1a**) in flow mode (Fig. 5A).<sup>a</sup>

| Entry | Reactor current (mA) | Charge (F/mol) | CV max. measured current ( $\mu$ A) | Conversion (%) <sup>b</sup> |
|-------|----------------------|----------------|-------------------------------------|-----------------------------|
| 1     | 15.0                 | 1.5            | 410                                 | 70                          |
| 2     | 17.5                 | 1.8            | 312                                 | 84                          |
| 3     | 20.0                 | 2.0            | 237                                 | 93                          |
| 4     | 15.0                 | 1.5            | 418                                 | 68                          |
| 5     | 17.5                 | 1.8            | 342                                 | 80                          |
| 6     | 20.0                 | 2.0            | 253                                 | 93                          |
| 7     | 15.0                 | 1.5            | 407                                 | 71                          |
| 8     | 17.5                 | 1.8            | 325                                 | 83                          |
| 9     | 15.0                 | 1.5            | 417                                 | 69                          |
| 10    | 16.0                 | 1.6            | 383                                 | 74                          |
| 11    | 17.5                 | 1.8            | 311                                 | 83                          |
| 12    | 19.0                 | 1.9            | 247                                 | 91                          |
| 13    | 16.0                 | 1.6            | 395                                 | 75                          |
| 14    | 17.5                 | 1.8            | 327                                 | 83                          |
| 15    | 19.0                 | 1.9            | 245                                 | 92                          |
| 16    | 20.0                 | 2.0            | 213                                 | 94                          |
| 17    | 22.0                 | 2.2            | 208                                 | 97                          |
| 18    | 14.0                 | 1.4            | 475                                 | 64                          |
| 19    | 17.0                 | 1.7            | 367                                 | 78                          |
| 20    | 21.0                 | 2.1            | 215                                 | 95                          |
| 21    | 19.5                 | 2.0            | 283                                 | 89                          |
| 22    | 14.5                 | 1.5            | 458                                 | 67                          |
| 23    | 18.5                 | 1.9            | 278                                 | 89                          |
| 24    | 18.2                 | 1.8            | 285                                 | 88                          |
| 25    | 16.7                 | 1.7            | 391                                 | 73                          |
| 26    | 13.5                 | 1.4            | 441                                 | 65                          |
| 27    | 17.5                 | 1.8            | 317                                 | 83                          |
| 28    | 22.0                 | 2.2            | 213                                 | 96                          |
| 29    | 17.0                 | 1.7            | 337                                 | 80                          |
| 30    | 18.0                 | 1.8            | 284                                 | 86                          |

<sup>a</sup> Flow setup depicted in Fig. 4 and Fig. S4 used, at 124  $\mu$ L/min. <sup>b</sup> Determined by HPLC (215 nm).



**Table S3.** Reaction parameters and inline cyclic voltammetry for the oxidation of diphenylmethanol (**1b**) in flow mode (Fig. 5B).<sup>a</sup>

| Entry | Reactor current (mA) | Charge (F/mol) | CV max. measured current ( $\mu$ A) | Conversion (%) <sup>b</sup> |
|-------|----------------------|----------------|-------------------------------------|-----------------------------|
| 1     | 8.0                  | 1.6            | 322                                 | 77                          |
| 2     | 7.0                  | 1.4            | 390                                 | 70                          |
| 3     | 6.0                  | 1.2            | 458                                 | 59                          |
| 4     | 6.5                  | 1.3            | 426                                 | 64                          |
| 5     | 7.5                  | 1.5            | 370                                 | 72                          |
| 6     | 9.0                  | 1.8            | 255                                 | 85                          |
| 7     | 9.2                  | 1.8            | 249                                 | 86                          |
| 8     | 10.0                 | 2.0            | 201                                 | 92                          |
| 9     | 10.4                 | 2.1            | 163                                 | 95                          |
| 10    | 10.2                 | 2.0            | 178                                 | 94                          |

<sup>a</sup> Flow setup depicted in Fig. 4 and Fig. S4 used, at 124  $\mu$ L/min. <sup>b</sup> Determined by HPLC (215 nm).

**Table S4.** Reaction parameters and inline cyclic voltammetry for the oxidation of 4-chlorobenzyl alcohol (**1c**) in flow mode (Fig. 5C).<sup>a</sup>

| Entry | Reactor current (mA) | Charge (F/mol) | CV max. measured current ( $\mu$ A) | Conversion (%) <sup>b</sup> |
|-------|----------------------|----------------|-------------------------------------|-----------------------------|
| 1     | 20.0                 | 2.0            | 248                                 | 89                          |
| 2     | 19.0                 | 1.9            | 289                                 | 88                          |
| 3     | 22.0                 | 2.2            | 218                                 | 94                          |
| 4     | 21.0                 | 2.1            | 235                                 | 92                          |
| 5     | 17.0                 | 1.7            | 308                                 | 84                          |
| 6     | 16.3                 | 1.6            | 329                                 | 81                          |
| 7     | 15.9                 | 1.6            | 341                                 | 79                          |
| 8     | 15.3                 | 1.5            | 367                                 | 76                          |
| 9     | 10.0                 | 1.0            | 521                                 | 56                          |
| 10    | 21.0                 | 2.1            | 245                                 | 93                          |
| 11    | 23.0                 | 2.3            | 217                                 | 96                          |
| 12    | 14.5                 | 1.5            | 248                                 | 89                          |
| 13    | 13.0                 | 1.3            | 419                                 | 64                          |
| 14    | 15.0                 | 1.5            | 371                                 | 73                          |
| 15    | 18.0                 | 1.8            | 299                                 | 84                          |

<sup>a</sup> Flow setup depicted in Fig. 4 and Fig. S4 used, at 124  $\mu$ L/min. <sup>b</sup> Determined by HPLC (215 nm).

**Table S5.** Data obtained for the reactor performance monitoring by inline cyclic voltammetry and offline HPLC analysis for the oxidation of diphenylmethanol (**1b**) (Fig. 6).<sup>a</sup>

| Entry | Experiment time (min) | CV max. measured current ( $\mu\text{A}$ ) | Conversion (%) <sup>b</sup> |
|-------|-----------------------|--------------------------------------------|-----------------------------|
| 1     | 6.0                   | 266                                        |                             |
| 2     | 7.5                   | 266                                        |                             |
| 3     | 8.7                   | 268                                        |                             |
|       | 10.9                  |                                            | 82                          |
| 4     | 11.1                  | 272                                        |                             |
| 5     | 13.0                  | 278                                        |                             |
| 6     | 14.0                  | 279                                        |                             |
| 7     | 17.1                  | 267                                        |                             |
| 8     | 19.1                  | 263                                        |                             |
| 9     | 20.3                  | 279                                        |                             |
|       | 22.4                  |                                            | 76                          |
| 10    | 22.5                  | 293                                        |                             |
| 11    | 25.8                  | 296                                        |                             |
| 12    | 27.0                  | 307                                        |                             |
| 13    | 31.3                  | 331                                        |                             |
|       | 32.4                  |                                            | 67                          |
| 14    | 33.6                  | 339                                        |                             |
| 15    | 37.2                  | 339                                        |                             |
| 16    | 38.5                  | 348                                        |                             |
| 17    | 40.5                  | 346                                        |                             |
|       | 42.6                  |                                            | 62                          |
| 18    | 42.8                  | 357                                        |                             |
| 19    | 46.8                  | 359                                        |                             |
| 20    | 48.0                  | 362                                        |                             |
| 21    | 49.5                  | 373                                        |                             |
|       | 54.7                  |                                            | 57                          |
| 22    | 54.9                  | 404                                        |                             |
| 23    | 56.2                  | 383                                        |                             |
| 24    | 61.1                  | 384                                        |                             |
|       | 63.9                  |                                            | 55                          |
| 25    | 64.1                  | 397                                        |                             |
| 26    | 67.3                  | 391                                        |                             |
| 27    | 68.5                  | 395                                        |                             |
|       | 69.7                  |                                            | 53                          |
| 28    | 70.8                  | 402                                        |                             |
| 29    | 75.0                  | 406                                        |                             |
| 30    | 77.0                  | 416                                        |                             |
|       | 79.3                  |                                            | 52                          |
| 31    | 79.4                  | 427                                        |                             |
| 32    | 83.6                  | 422                                        |                             |
| 33    | 85.0                  | 423                                        |                             |
|       | 87.2                  |                                            | 49                          |
| 34    | 87.3                  | 432                                        |                             |
| 35    | 6.0                   | 266                                        |                             |

<sup>a</sup> Flow setup depicted in Fig. 4 and Fig. S4 used, at 1.9 F/mol and 124  $\mu\text{L}/\text{min}$  over the course of 90 min. <sup>b</sup> Determined by offline HPLC analysis (215 nm).
